# Supplementary material
Source: PubMed Central journal article supplement (PMC6643771)
Supplement: ao7b01067_si_001.pdf [file ao7b01067_si_001.pdf]

---

# Tannic Acid-Based Multifunctional Hydrogels with Facile Adjustable Adhesion and Cohesion Contributed by Polyphenol Supramolecular Chemistry

Hailong Fan, Jiahui Wang, Qiuya Zhang and Zhaoxia Jin\*

Department of Chemistry, Renmin University of China, Beijing, 100872, P. R. China

Email address: jinzx@ruc.edu.cn

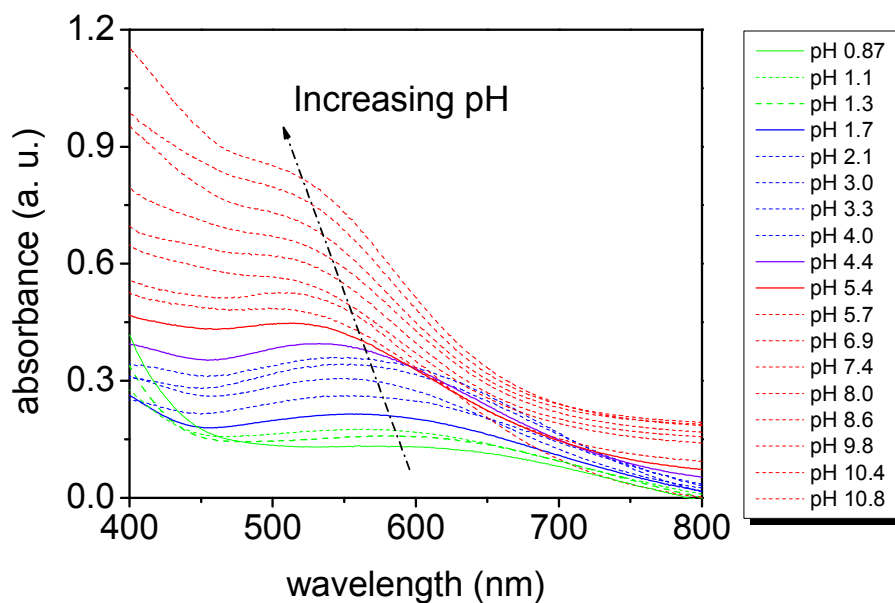

Figure S1. UV-vis absorption PDDA/TA/Fe<sup>III</sup> complex at pH values from 0.5 to 11.

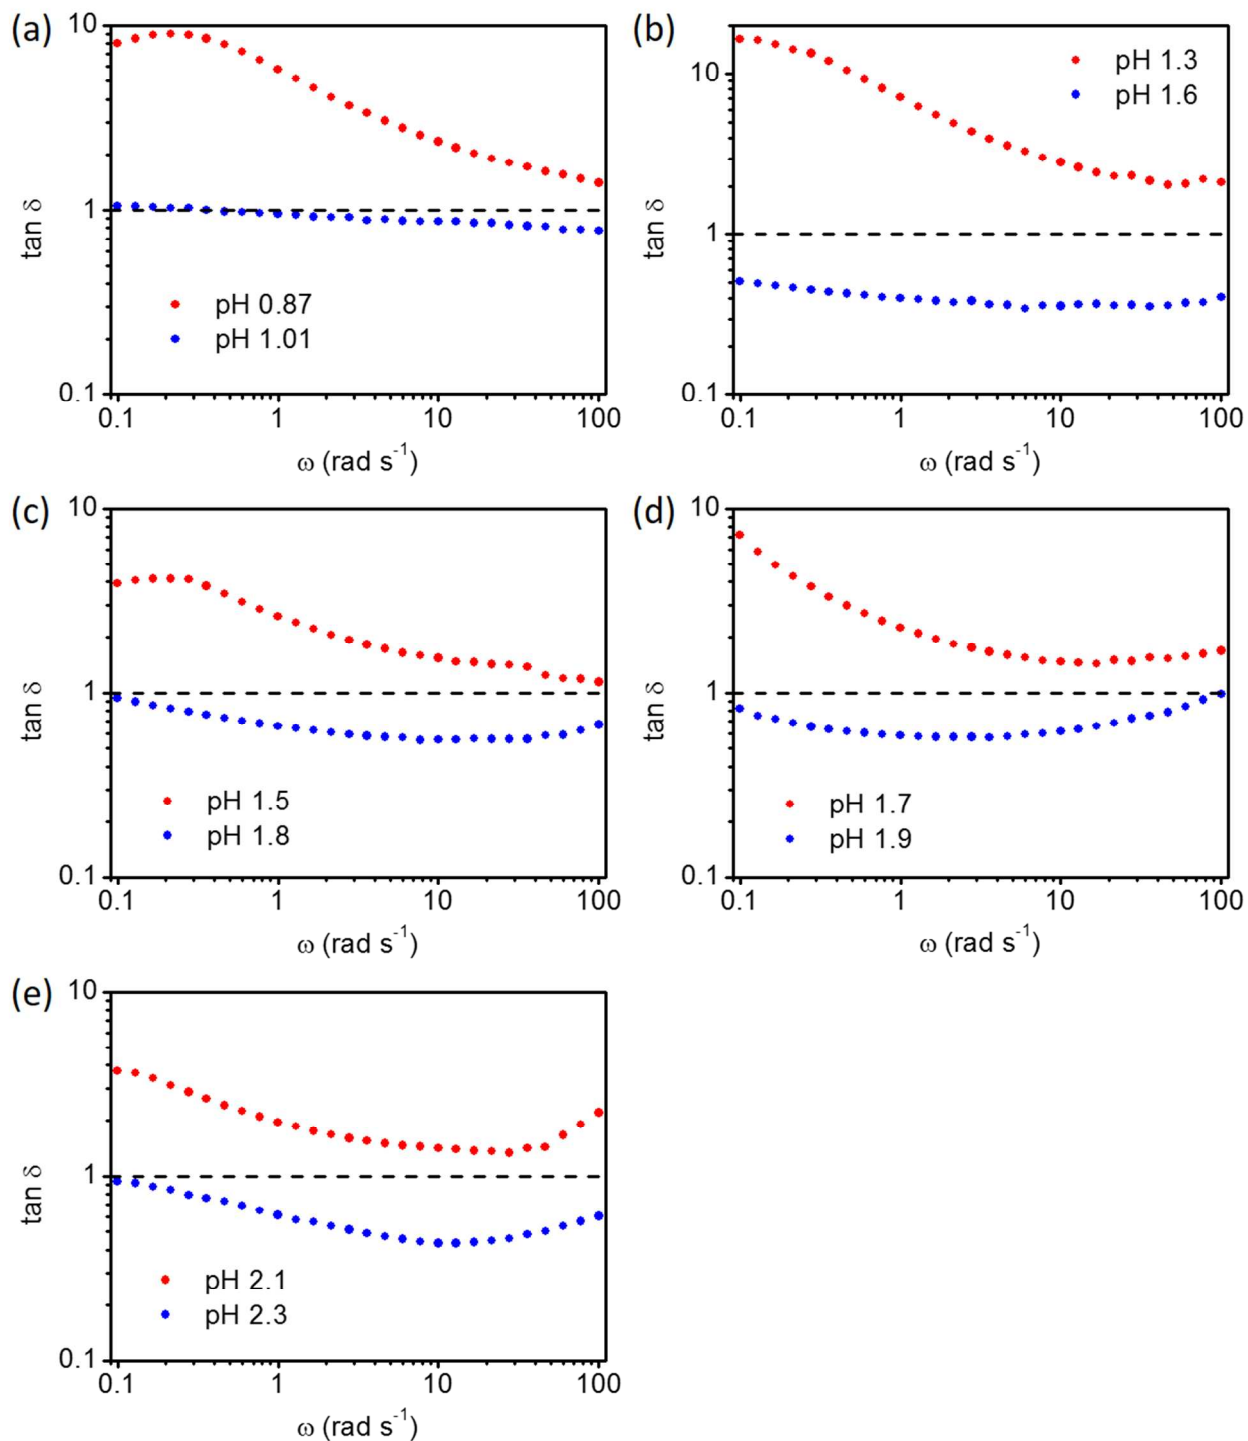

Figure S2. Loss tangent ( $\tan \delta$ ) plotted as a function of the angular frequency of initial PTFe solution and that of hydrogels at critical gelation pH values. (a) PTFe-1, (b) PTFe-2, (c) PTFe-3, (d) PTFe-4, and (e) PTFe-5.

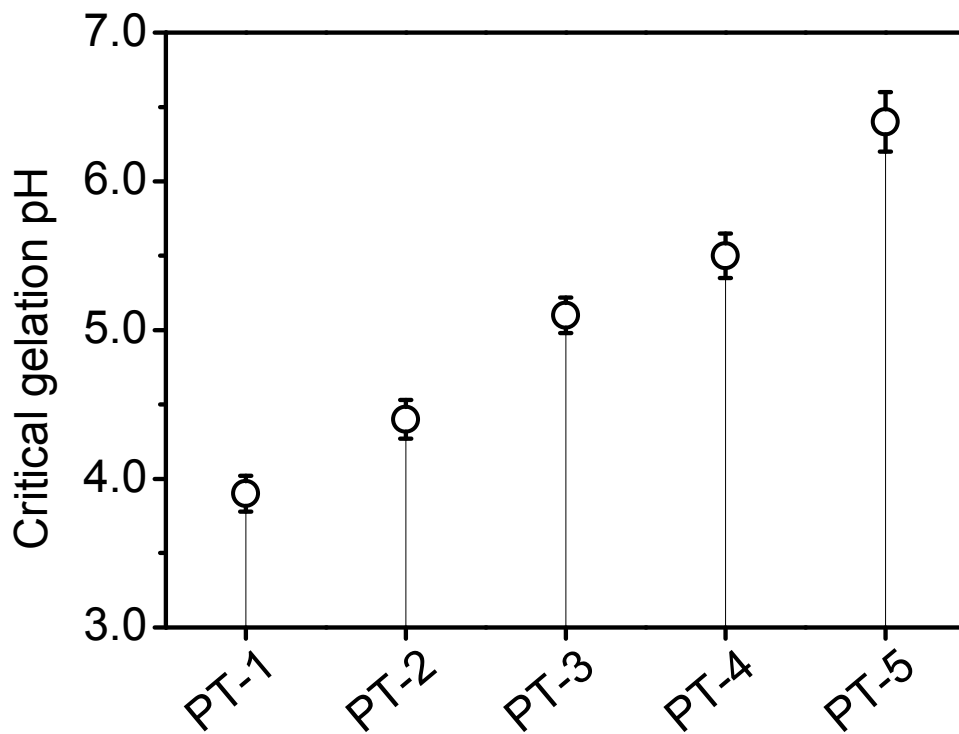

Figure S3. The critical gelation pH of PT hydrogels. The weight ratio of PDDA to TA of PT-1 to PT-5 was 2:1, 4:1, 10:1, 15:1, and 20:1, respectively.

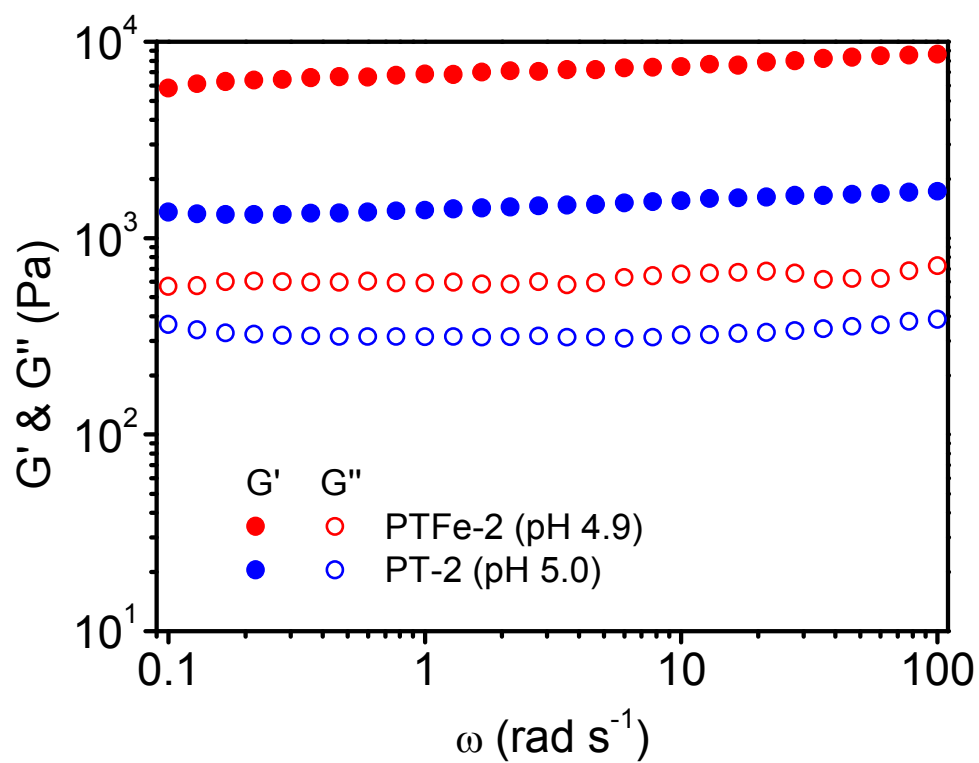

Figure S4. The storage  $G'$  and loss  $G''$  moduli of PTFe-2 and PT-2 hydrogels with angular frequency swept between 0.1 and 100  $\text{rad s}^{-1}$ . The weight ratio of PDDA to TA of PTFe-2 and PT-2 were 2:1.

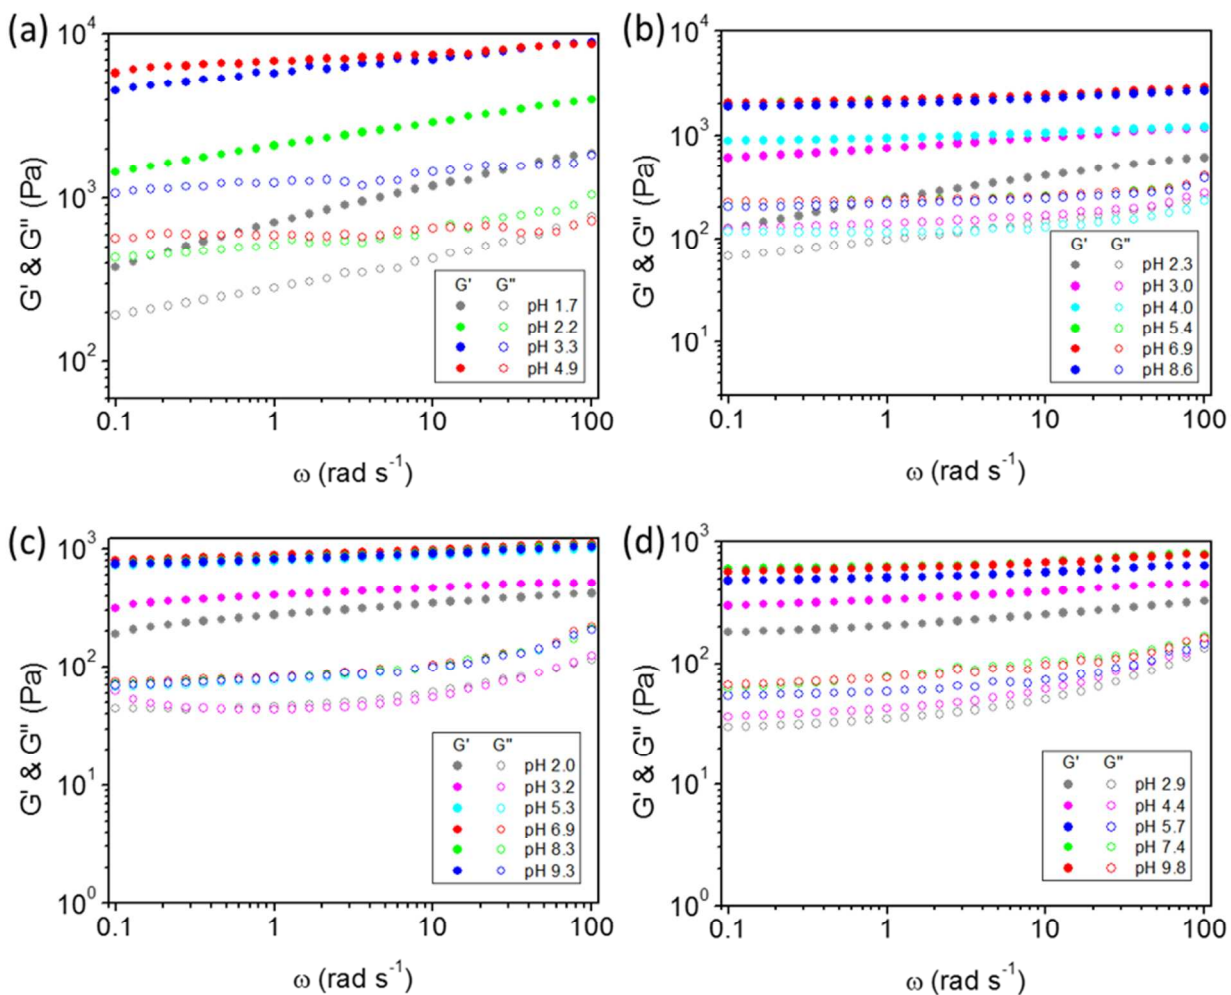

Figure S5. The storage  $G'$  and loss  $G''$  moduli of PTFe hydrogels with angular frequency swept between 0.1 and 100  $\text{rad s}^{-1}$ . (a) PTFe-2, (b) PTFe-3, (c) PTFe-4, and (d) PTFe-5.

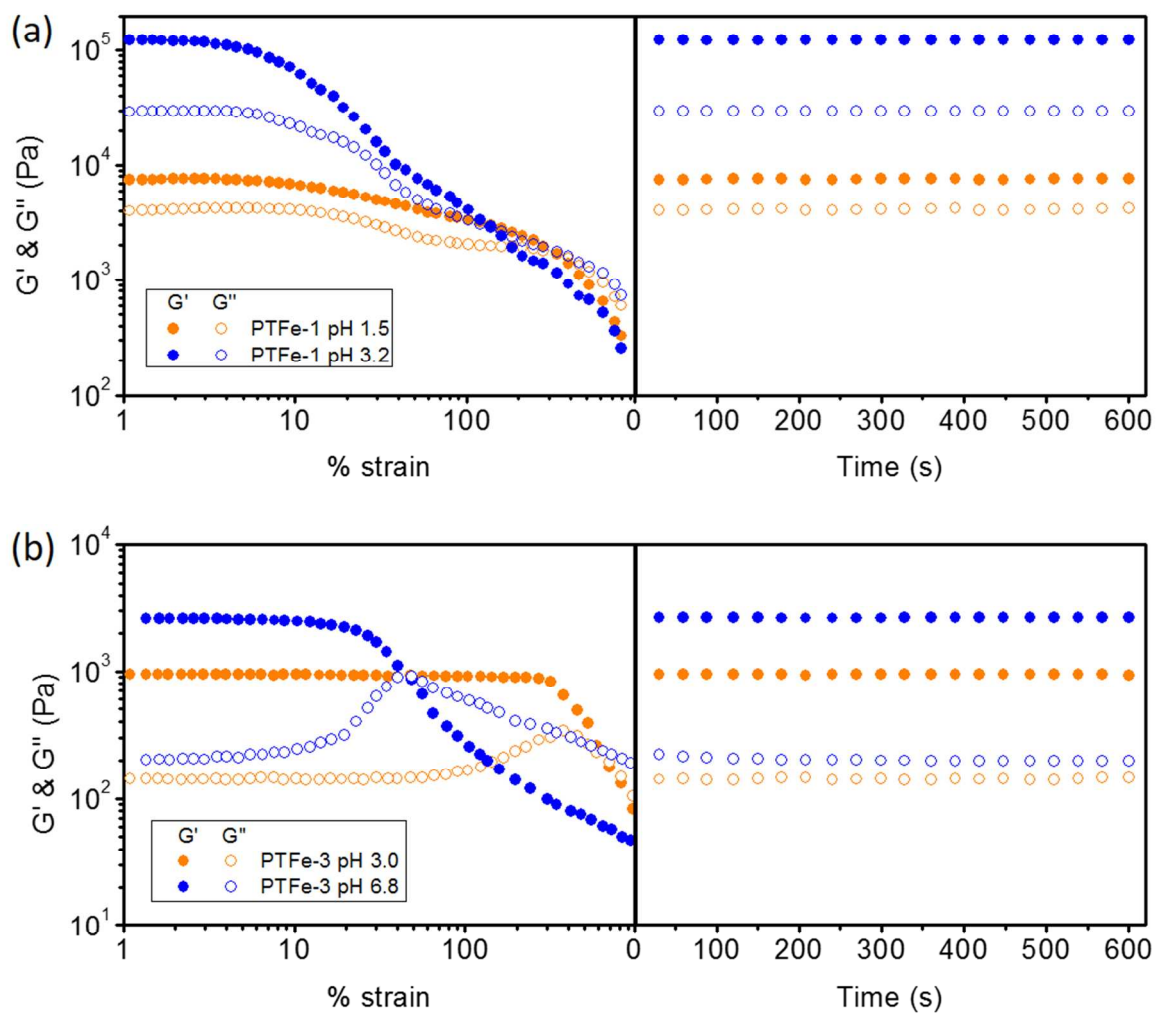

Figure S6. Quantitative tests of the self-healing properties of PTFe hydrogels. Strain was increased from 1% to 1000% at 1 Hz, and the recovery was monitored at 1% strain with 1 Hz. (a) PTFe-1, and (b) PTFe-3.

Table S1. The weight ratios of various components and the initial pH values in the fabrication of PDDA-TA bicomponent hydrogels

| sample name | weight ratio of PDDA:TA | initial solution pH |
|-------------|-------------------------|---------------------|
| PT-1        | 2 : 1                   | 1.4                 |
| PT-2        | 4 : 1                   | 1.8                 |
| PT-3        | 10 : 1                  | 2.2                 |
| PT-4        | 15 : 1                  | 2.5                 |
| PT-5        | 20 : 1                  | 2.7                 |

Table S2. The ionic conductivities of hydrogels

| Sample             | pH               | conductivity ( $S\ m^{-1}$ ) |                  |
|--------------------|------------------|------------------------------|------------------|
| PTFe-2             | Initial solution | 1.3                          | $4.56 \pm 0.002$ |
|                    | hydrogel         | 2.0                          | $4.30 \pm 0.09$  |
|                    |                  | 2.7                          | $4.03 \pm 0.14$  |
|                    |                  | 3.2                          | $4.32 \pm 0.06$  |
|                    |                  | 4.9                          | $4.42 \pm 0.02$  |
| PTFe-4             | Initial solution | 1.9                          | $4.25 \pm 0.004$ |
|                    | hydrogel         | 3.6                          | $4.19 \pm 0.04$  |
|                    |                  | 4.0                          | $4.25 \pm 0.02$  |
|                    |                  | 6.4                          | $4.28 \pm 0.02$  |
|                    |                  | 8.3                          | $4.34 \pm 0.02$  |
| PDDA-TA- $Fe_3O_4$ | Initial solution | 2.9                          | $3.55 \pm 0.001$ |
|                    | hydrogel         | 4.7                          | $3.68 \pm 0.01$  |
|                    |                  | 5.8                          | $3.77 \pm 0.03$  |
|                    |                  | 7.4                          | $3.90 \pm 0.02$  |
